# Supplementary material for: Effect of Different Functional Food Supplements on the Gut Microbiota of Prediabetic Indonesian Individuals during Weight Loss
Source: MDPI journal article supplement (doi:10.3390/nu14040781), 2022-02-13
Supplement: s1 [file s1]

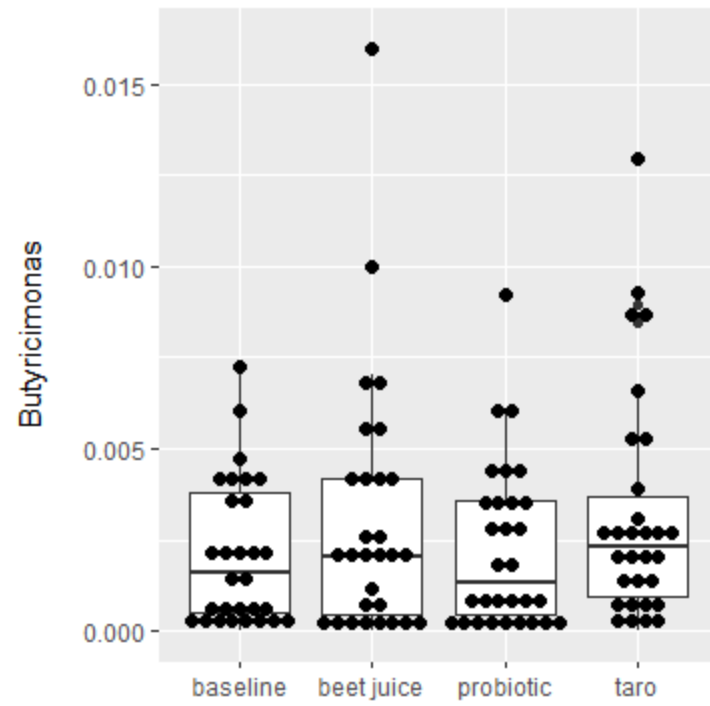

**Supplementary Figure S1.** Difference in *Butyricimonas* between 4 baseline samples and the different intervention samples.

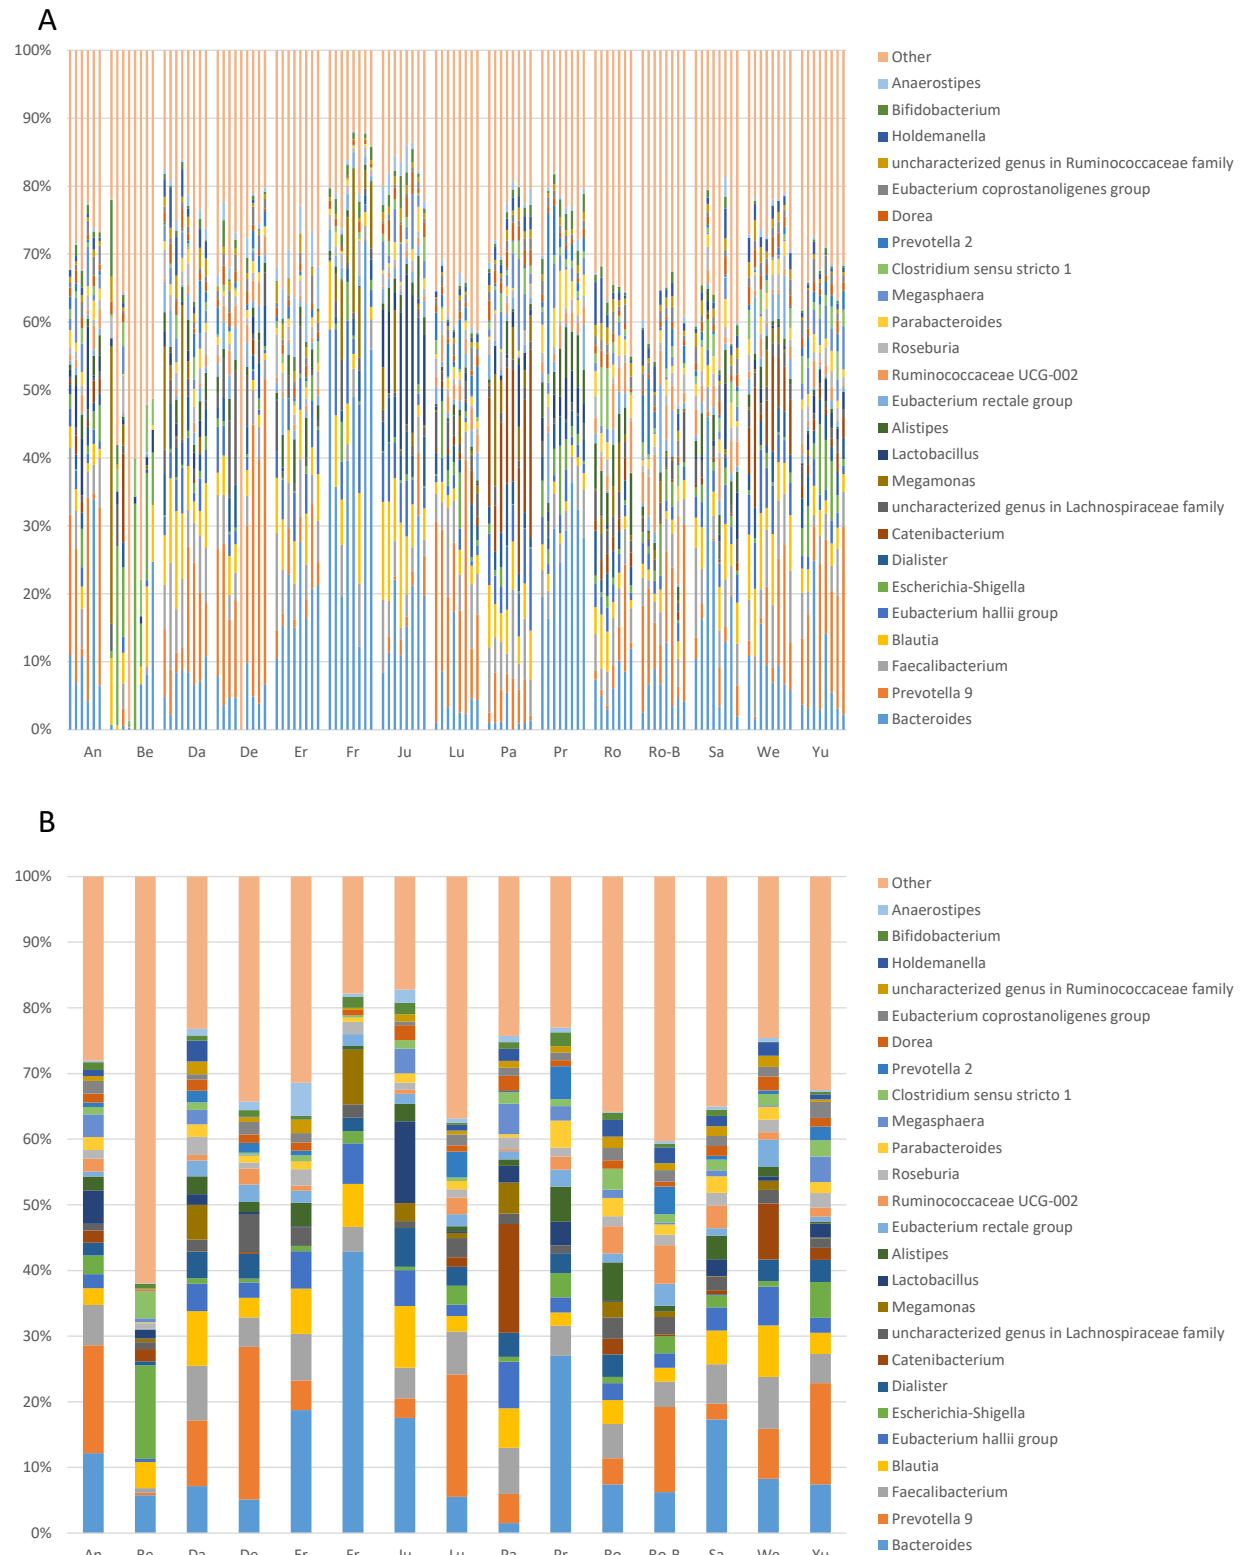

**Supplementary Figure S2.** Relative abundance of the top 25 taxa in the population. The remaining taxa are clustered under 'Other'. A. Individual samples. B. Average of all samples of each individual.
